# Supplementary material for: Predictive value of CONUT score combined with serum CA199 levels in postoperative survival of patients with pancreatic ductal adenocarcinoma: a retrospective study
Source: PeerJ. 2020 Mar 18;8:e8811. doi: 10.7717/peerj.8811 (PMC7085292; doi:10.7717/peerj.8811)
Supplement: Supplemental Information 1 [file peerj-08-8811-s001.xls]

## Sheet: 胰腺癌数据 - 8-5操作
ID	count score	size (cm)	Gender（Male=1，Female=2）	Age (years)	BMI	location（head= 1，body and tail= 2，dispersed=3）	Histopathological type（poorly=1，medium-high differentiation=2）	Peripancreatic infiltration（Positive=1，Negative=2）	Lymph node metastasis（Positive=1，Negative=2）	Lymphatic vessel invasion（Positive=1，Negative=2）	Invasion of portal vein system（Positive=1，Negative=2）	Superior mesenteric artery invasion（Positive=1，Negative=2）	Nerve plexus invasion（Positive=1，Negative=2）	Clavien-Dindo classification（＜IIIa=1，≥IIIa=2）	Pancreatic fistula（Presence=1，Absence=2）	Preoperative PNI	pTNM stage	CA199	CEA	OS（months）	OS state	RFS	RFS state
1	3	4	Male	54	21.6128	head	medium-high differentiation	Negative	Negative	Positive	Negative	Negative	Negative	＜IIIa	Absence	47.8	1	10.06	5.83	40	0	32	1
2	6	6.1	Female	39	17.9931	body and tail	poorly	Positive	Negative	Negative	Negative	Negative	Positive	＜IIIa	Presence	35.45	1	17.7	5.01	28	0	28	0
3	2	3	Male	60	26.6389	head	medium-high differentiation	Negative	Negative	Positive	Negative	Negative	Negative	＜IIIa	Absence	44.2	1	9.56	1.46	45	1	40	1
4	3	5	Male	63	21.875	body and tail	poorly	Positive	Positive	Positive	Positive	Positive	Positive	＜IIIa	Absence	51.35	3	700	2	8	0	8	0
5	4	2	Male	66	20.2538	head	poorly	Positive	Positive	Positive	Positive	Negative	Positive	＜IIIa	Absence	41.6	2	500	4	7	1	6	1
6	2	4	Female	57	19.0311	head	poorly	Negative	Negative	Positive	Negative	Negative	Positive	＜IIIa	Absence	46.65	1	15.03	2.71	31	0	25	1
7	4	3	Male	45	19.487	body and tail	medium-high differentiation	Negative	Negative	Negative	Negative	Negative	Negative	＜IIIa	Absence	47.7	1	12.56	1.91	34	1	30	1
8	6	4	Male	58	24.3141	head	poorly	Positive	Positive	Positive	Positive	Positive	Positive	≥IIIa	Absence	36.15	3	600	1.69	6	1	6	1
9	2	5.3	Female	68	19.563	head	medium-high differentiation	Positive	Positive	Positive	Negative	Negative	Positive	＜IIIa	Absence	49.35	3	180.22	3.26	9	1	7	1
10	1	5	Male	74	17.9282	head	poorly	Positive	Negative	Positive	Positive	Negative	Positive	＜IIIa	Absence	53.95	3	400	17.15	10	0	10	0
11	2	2	Female	45	18.026	head	medium-high differentiation	Negative	Negative	Positive	Negative	Negative	Negative	＜IIIa	Absence	61.45	1	47.97	6.54	42	1	39	1
12	2	6	Female	66	19.5556	head	medium-high differentiation	Negative	Positive	Positive	Negative	Negative	Positive	＜IIIa	Presence	43.05	3	400	3.22	15	0	15	0
13	2	3	Male	56	20.9366	head	poorly	Positive	Negative	Positive	Negative	Negative	Positive	＜IIIa	Absence	50.85	1	400	13.35	13	1	11	1
14	2	3	Female	49	24	head	poorly	Positive	Positive	Positive	Negative	Positive	Positive	＜IIIa	Absence	56.55	3	203.35	4.62	14	1	14	1
15	3	2	Female	64	21.5045	dispersed	medium-high differentiation	Positive	Negative	Positive	Negative	Negative	Positive	＜IIIa	Absence	57.7	1	11.89	1.76	23	0	23	0
16	3	3	Male	67	21.1553	head	medium-high differentiation	Positive	Positive	Negative	Positive	Positive	Negative	＜IIIa	Absence	38.2	3	400	7.11	7	1	4	1
17	2	5	Female	45	20.6612	body and tail	poorly	Positive	Positive	Positive	Positive	Negative	Positive	＜IIIa	Absence	51.9	3	25.6	3.2	6	1	3	1
18	5	8	Male	61	26.6696	head	poorly	Positive	Positive	Negative	Positive	Positive	Positive	≥IIIa	Presence	41	3	11.89	1.23	5	0	5	0
19	3	2	Male	41	22.4813	head	poorly	Positive	Negative	Positive	Positive	Negative	Positive	≥IIIa	Absence	43.2	1	66.33	9.22	9	0	9	0
20	4	5	Male	38	22.9854	head	medium-high differentiation	Positive	Positive	Positive	Negative	Positive	Positive	＜IIIa	Presence	43.95	3	76.99	38.5	8	1	5	1
21	0	4	Male	60	26.7094	head	poorly	Positive	Positive	Negative	Positive	Negative	Negative	＜IIIa	Absence	51.2	2	400	4.29	10	0	9	1
22	1	6	Female	50	23.2335	body and tail	medium-high differentiation	Negative	Negative	Positive	Negative	Negative	Positive	＜IIIa	Absence	50.75	3	36.05	2.55	27	0	27	0
23	3	8	Female	43	19.8141	head	poorly	Positive	Positive	Positive	Negative	Positive	Negative	＜IIIa	Absence	51.8	3	400	6.2	11	1	11	1
24	4	4	Male	69	20.7612	body and tail	poorly	Positive	Positive	Negative	Negative	Negative	Positive	＜IIIa	Absence	50.75	2	16.32	2.38	10	1	8	1
25	2	2	Male	46	23.3067	head	medium-high differentiation	Negative	Negative	Positive	Negative	Negative	Negative	＜IIIa	Presence	52.2	1	27.8	3.5	40	0	40	0
26	6	4	Male	44	25.6055	head	poorly	Positive	Positive	Positive	Positive	Negative	Positive	≥IIIa	Absence	35.7	3	147.65	3.56	3	0	3	0
27	5	9.5	Female	73	18.902	body and tail	medium-high differentiation	Positive	Positive	Positive	Negative	Negative	Positive	≥IIIa	Absence	34.55	3	132.46	26.49	4	1	2	1
28	6	3	Female	63	18.75	head	medium-high differentiation	Positive	Negative	Positive	Negative	Negative	Negative	≥IIIa	Absence	35.6	2	375.14	2.33	1.5	1	1.5	1
29	3	5	Female	71	16.0231	head	poorly	Positive	Positive	Positive	Negative	Positive	Positive	＜IIIa	Presence	37.65	3	400	37.15	3	1	2	1
30	7	2.5	Male	53	15.917	head	medium-high differentiation	Positive	Negative	Positive	Negative	Negative	Positive	＜IIIa	Absence	31.9	1	112	2.3	5	0	4	1
31	4	4	Female	62	20.3428	dispersed	medium-high differentiation	Positive	Negative	Negative	Positive	Negative	Positive	≥IIIa	Absence	36.85	1	267.44	2.56	8	1	7	1
32	3	1.2	Female	68	21.9289	head	poorly	Positive	Positive	Positive	Positive	Negative	Positive	＜IIIa	Absence	47.85	2	70.43	2.41	11	0	8	0
33	2	3	Male	41	20.0474	body and tail	medium-high differentiation	Positive	Negative	Positive	Negative	Negative	Negative	＜IIIa	Absence	45	1	400	6.33	25	0	25	0
34	4	2	Male	63	24.6094	head	poorly	Positive	Negative	Negative	Positive	Negative	Positive	＜IIIa	Absence	40.05	1	214.12	2.22	8	1	8	1
35	5	2	Male	69	20.9572	head	poorly	Positive	Positive	Positive	Positive	Negative	Negative	＜IIIa	Presence	43.45	2	400	1.46	7	1	5	1
36	2	5	Male	41	20.8209	head	poorly	Positive	Positive	Negative	Negative	Negative	Positive	＜IIIa	Absence	39.4	3	400	6.33	14	0	11	1
37	0	1.6	Female	54	22.4913	head	medium-high differentiation	Positive	Negative	Positive	Negative	Negative	Negative	＜IIIa	Absence	47.75	1	158.27	3.36	39	1	39	1
38	2	4.3	Female	53	22.231	head	medium-high differentiation	Negative	Negative	Negative	Negative	Negative	Negative	＜IIIa	Absence	46.9	3	67.39	3.47	47	0	47	0
39	7	6	Female	45	14.36	body and tail	medium-high differentiation	Negative	Positive	Positive	Positive	Negative	Positive	≥IIIa	Presence	29.7	3	184.42	4.6	9	1	7	1
40	2	2	Male	65	24.4561	head	medium-high differentiation	Negative	Negative	Negative	Negative	Negative	Negative	＜IIIa	Absence	46.9	1	1	10.49	43	0	43	0
41	4	3	Male	51	26.8977	head	medium-high differentiation	Negative	Negative	Positive	Negative	Negative	Negative	≥IIIa	Presence	49.35	1	1	3.55	56	1	50	1
42	5	2	Male	43	23.3067	body and tail	poorly	Positive	Positive	Positive	Negative	Positive	Positive	＜IIIa	Absence	46.05	3	148.26	2.55	6	0	6	1
43	1	4	Female	69	23.3844	head	medium-high differentiation	Positive	Negative	Positive	Positive	Negative	Positive	＜IIIa	Absence	48.85	2	92.47	3.7	28	0	28	0
44	2	1	Male	64	22.1453	head	medium-high differentiation	Positive	Negative	Positive	Negative	Negative	Negative	＜IIIa	Absence	44.05	1	15	1.65	36	0	36	0
45	3	2	Female	61	28.3039	head	medium-high differentiation	Positive	Positive	Negative	Positive	Positive	Positive	≥IIIa	Absence	45.25	3	226.59	2.55	8	1	6	1
46	3	2	Male	39	20.5693	head	poorly	Positive	Positive	Positive	Positive	Negative	Positive	＜IIIa	Absence	44.9	2	242.5	6.79	9	0	6	0
47	6	5.2	Female	73	20.0777	head	poorly	Positive	Negative	Positive	Negative	Negative	Positive	≥IIIa	Absence	39.65	3	156.63	1.27	1.5	1	1.5	1
48	0	6	Male	49	25.0995	head	medium-high differentiation	Positive	Negative	Positive	Negative	Negative	Positive	＜IIIa	Absence	56.75	3	364.35	1.99	14	1	14	1
49	4	4	Female	57	23.833	head	medium-high differentiation	Positive	Negative	Positive	Negative	Negative	Negative	＜IIIa	Absence	37.55	1	400	1.73	10	1	8	1
50	0	3	Male	51	22.3133	body and tail	medium-high differentiation	Negative	Negative	Positive	Negative	Negative	Positive	＜IIIa	Presence	57.1	1	71.71	3.69	30	0	30	0
51	3	1	Male	48	17.3745	head	poorly	Positive	Positive	Positive	Negative	Positive	Positive	＜IIIa	Absence	46.55	3	1.38	5.94	11	0	11	0
52	2	2	Male	46	27.8293	head	medium-high differentiation	Positive	Negative	Positive	Negative	Negative	Negative	＜IIIa	Presence	50.5	1	151.23	1.55	27	1	22	1
53	5	3	Male	61	22.6562	body and tail	poorly	Positive	Negative	Negative	Positive	Negative	Positive	＜IIIa	Absence	38.8	1	68.14	5.46	10	1	10	1
54	3	3	Female	50	19.9792	head	poorly	Positive	Negative	Positive	Negative	Negative	Negative	＜IIIa	Absence	52.7	1	146	2.55	15	0	15	0
55	3	2	Male	53	24.2215	head	medium-high differentiation	Positive	Positive	Positive	Negative	Negative	Positive	＜IIIa	Absence	44.45	2	229.4	3.33	7	1	5	1
56	6	4	Male	50	22.2137	head	poorly	Positive	Positive	Positive	Negative	Negative	Negative	≥IIIa	Absence	38.2	3	291.28	2.98	6	1	5	1
57	3	2	Male	63	21.4844	head	poorly	Positive	Negative	Positive	Negative	Negative	Positive	＜IIIa	Absence	39.9	1	96.64	4.16	16	0	12	1
58	3	3	Female	64	20.6612	head	medium-high differentiation	Positive	Negative	Positive	Negative	Negative	Negative	＜IIIa	Absence	40.15	1	11.23	1.76	28	0	28	0
59	3	2	Male	46	18.7328	head	medium-high differentiation	Negative	Negative	Positive	Positive	Negative	Negative	＜IIIa	Presence	50.95	1	30.19	1.88	44	1	44	0
60	2	1.6	Female	57	21.6413	head	poorly	Positive	Negative	Positive	Negative	Negative	Positive	＜IIIa	Absence	50.3	1	400	7.8	19	1	17	1
61	4	3	Female	59	18.424	head	medium-high differentiation	Positive	Negative	Positive	Negative	Negative	Positive	＜IIIa	Absence	48.3	1	62.13	1.94	15	1	12	1
62	6	4	Male	56	22.2656	dispersed	medium-high differentiation	Positive	Negative	Negative	Negative	Negative	Positive	≥IIIa	Absence	39.5	1	8.59	1.88	14	0	14	1
63	2	4	Female	63	25.4375	body and tail	medium-high differentiation	Positive	Negative	Positive	Negative	Negative	Positive	＜IIIa	Absence	38.9	1	400	5.91	19	0	19	0
64	6	2	Male	64	19.2336	head	poorly	Positive	Positive	Positive	Negative	Positive	Positive	＜IIIa	Absence	36.3	3	400	9.33	8	1	8	1
65	1	4	Female	43	21.4844	head	medium-high differentiation	Positive	Negative	Positive	Negative	Negative	Positive	＜IIIa	Absence	51.45	3	389.36	2.53	14	1	11	1
66	3	2.5	Male	67	21.4844	head	medium-high differentiation	Positive	Positive	Negative	Negative	Positive	Positive	＜IIIa	Absence	44.3	3	272.7	2.63	7	0	6	1
67	4	3	Female	65	19.1467	head	poorly	Positive	Negative	Positive	Negative	Negative	Positive	≥IIIa	Presence	39.7	2	366	3.76	5	1	5	1
68	0	4	Male	60	26.7094	dispersed	medium-high differentiation	Positive	Positive	Negative	Positive	Negative	Negative	＜IIIa	Absence	51.2	2	400	4.29	14	1	13	1
69	2	3.3	Female	50	23.2335	body and tail	medium-high differentiation	Negative	Negative	Positive	Negative	Negative	Negative	＜IIIa	Absence	50.75	1	36	2.55	46	1	42	1
70	2	3	Female	45	20.0288	head	medium-high differentiation	Negative	Negative	Positive	Negative	Negative	Positive	＜IIIa	Absence	46.15	1	400	3.45	43	0	43	0
71	6	3.5	Male	56	21.0077	head	medium-high differentiation	Negative	Negative	Positive	Negative	Negative	Negative	＜IIIa	Absence	43.05	1	369.84	5.6	1.5	1	1.5	1
72	6	8.6	Female	41	17.4413	body and tail	poorly	Positive	Positive	Positive	Negative	Positive	Positive	＜IIIa	Presence	30.7	3	151.33	4.78	2.5	0	2.5	0
73	6	2.5	Male	62	25.8876	head	medium-high differentiation	Negative	Negative	Positive	Negative	Negative	Positive	＜IIIa	Absence	39.45	1	142.35	1.23	1.5	1	1.5	1
74	3	4.5	Male	65	21.2183	body and tail	poorly	Positive	Positive	Negative	Positive	Positive	Positive	＜IIIa	Absence	46.6	3	323.1	1.77	3	1	2	1
75	5	1.5	Male	78	19.6235	head	poorly	Positive	Positive	Positive	Positive	Positive	Positive	＜IIIa	Absence	36.85	3	127.16	3.77	3	0	3	1
76	5	4.5	Female	39	18.4672	head	poorly	Positive	Negative	Negative	Negative	Negative	Negative	＜IIIa	Absence	41.9	3	6.59	2.48	5	1	4	1
77	7	2.5	Male	47	18.9069	body and tail	medium-high differentiation	Negative	Positive	Positive	Negative	Negative	Positive	＜IIIa	Absence	42.95	3	106.7	1.68	4	1	2	1
78	4	3.5	Male	57	23.6652	head	poorly	Positive	Positive	Positive	Positive	Positive	Negative	≥IIIa	Absence	31.4	3	360.2	1.46	5	1	5	1
79	6	2.5	Female	70	18.902	head	medium-high differentiation	Positive	Negative	Positive	Negative	Negative	Negative	＜IIIa	Absence	44.6	1	594.7	3.03	56	1	50	1
80	2	4.5	Male	76	17.3611	head	poorly	Positive	Positive	Positive	Positive	Positive	Positive	＜IIIa	Absence	49.2	3	20.3	16.92	8	0	6	1
81	5	4.5	Female	47	17.4044	head	medium-high differentiation	Negative	Negative	Negative	Negative	Negative	Positive	＜IIIa	Absence	56.7	3	142.96	6.31	6	0	6	0
82	6	3.5	Female	68	18.8588	head	medium-high differentiation	Positive	Negative	Positive	Negative	Negative	Negative	＜IIIa	Presence	38.3	2	285.98	2.99	26	1	23	1
83	4	2.5	Male	58	20.3223	head	poorly	Positive	Negative	Positive	Negative	Positive	Positive	＜IIIa	Absence	46.1	3	494.7	13.12	7	1	6	1
84	3	2.5	Female	31	23.2446	head	poorly	Positive	Positive	Positive	Negative	Positive	Positive	＜IIIa	Absence	51.8	3	394.8	4.39	5	0	4	1
85	5	1.5	Female	36	20.8117	dispersed	medium-high differentiation	Positive	Negative	Negative	Negative	Negative	Negative	＜IIIa	Absence	52.95	1	313.2	1.53	37	1	30	1
86	3	2.5	Male	69	20.5499	head	medium-high differentiation	Positive	Positive	Positive	Positive	Positive	Positive	＜IIIa	Absence	33.45	3	224.1	6.88	7	1	6	1
87	3	4.5	Female	47	19.9792	body and tail	poorly	Positive	Positive	Positive	Positive	Positive	Positive	＜IIIa	Absence	47.15	3	267.4	2.97	7	1	5	1
88	3	11.5	Male	63	26.0604	head	poorly	Positive	Positive	Positive	Positive	Negative	Positive	≥IIIa	Presence	36.25	3	694.3	1	8	1	6	1
89	4	1.5	Male	43	21.83	head	poorly	Positive	Negative	Positive	Positive	Negative	Negative	≥IIIa	Absence	38.45	1	71.69	8.99	8	1	7	1
90	4	4.5	Male	40	22.3863	head	medium-high differentiation	Positive	Positive	Positive	Negative	Positive	Positive	＜IIIa	Presence	39.2	3	262.14	38.27	5	1	3	1
91	3	3.5	Male	62	25.9645	head	poorly	Positive	Positive	Positive	Positive	Positive	Negative	＜IIIa	Absence	46.45	3	208.82	4.06	8	0	8	0
92	3	5.5	Female	52	22.5466	body and tail	medium-high differentiation	Negative	Negative	Negative	Negative	Negative	Positive	＜IIIa	Absence	46	3	221.29	2.32	8	1	6	1
93	6	7.5	Female	45	19.1953	head	poorly	Positive	Negative	Positive	Negative	Positive	Positive	＜IIIa	Absence	47.05	3	343.2	5.97	8	0	8	1
94	2	3.5	Male	73	20.1771	body and tail	poorly	Positive	Positive	Negative	Negative	Positive	Positive	＜IIIa	Absence	46	3	174.92	2.15	9	1	7	1
95	3	1.5	Male	48	22.6757	head	medium-high differentiation	Negative	Positive	Positive	Negative	Negative	Positive	＜IIIa	Presence	47.45	2	61.03	3.27	8	0	6	1
96	7	6.5	Male	46	24.9649	head	poorly	Positive	Negative	Positive	Positive	Negative	Negative	≥IIIa	Absence	30.95	3	179.12	3.33	9	1	8	1
97	3	3.9	Female	75	18.2563	body and tail	medium-high differentiation	Negative	Positive	Positive	Negative	Negative	Positive	≥IIIa	Absence	29.8	2	237.2	26.26	18	0	18	0
98	1	2.5	Female	65	18.132	head	medium-high differentiation	Positive	Positive	Positive	Negative	Negative	Positive	≥IIIa	Absence	30.85	2	394.6	2.1	10	0	10	0
99	0	4.5	Female	78	15.4266	head	poorly	Positive	Negative	Positive	Negative	Positive	Negative	＜IIIa	Presence	32.9	3	343.2	36.92	10	1	8	1
100	4	2	Male	55	15.3894	head	medium-high differentiation	Positive	Positive	Positive	Negative	Negative	Positive	＜IIIa	Absence	27.15	2	11.02	2.07	11	1	9	1
101	4	3.5	Female	64	19.6506	dispersed	medium-high differentiation	Positive	Negative	Positive	Positive	Positive	Positive	≥IIIa	Absence	32.1	3	394.5	2.33	10	0	10	1
102	5	1.7	Female	70	21.2084	head	poorly	Positive	Negative	Positive	Positive	Negative	Positive	＜IIIa	Absence	43.1	1	62.84	2.18	12	0	12	0
103	3	2.5	Male	43	19.4874	body and tail	medium-high differentiation	Positive	Negative	Positive	Negative	Negative	Positive	＜IIIa	Absence	40.25	1	394.4	6.1	11	0	11	0
104	3	1.5	Male	65	23.9188	head	poorly	Positive	Positive	Positive	Positive	Positive	Negative	＜IIIa	Absence	35.3	3	65.13	1.99	12	1	9	1
105	3	1.5	Male	71	20.3244	head	poorly	Positive	Positive	Positive	Positive	Positive	Negative	＜IIIa	Presence	38.7	3	3.92	1.23	11	0	11	0
106	2	4.5	Male	43	20.202	head	poorly	Positive	Negative	Positive	Negative	Negative	Positive	＜IIIa	Absence	34.65	3	394.3	6.1	13	1	10	1
107	2	1.1	Female	56	21.8871	head	medium-high differentiation	Positive	Positive	Positive	Negative	Negative	Positive	＜IIIa	Absence	43	2	198.05	3.13	14	0	14	0
108	3	3.8	Female	55	21.6128	head	medium-high differentiation	Negative	Negative	Negative	Negative	Positive	Positive	＜IIIa	Absence	42.15	3	394.2	3.24	17	1	15	1
109	0	5.5	Female	47	13.7656	body and tail	medium-high differentiation	Negative	Positive	Positive	Positive	Positive	Positive	≥IIIa	Presence	24.95	3	359.05	4.37	14	0	14	0
110	6	1.5	Male	67	23.7253	head	medium-high differentiation	Positive	Negative	Negative	Negative	Negative	Positive	＜IIIa	Absence	42.15	1	3.29	10.26	16	0	16	0
111	1	2.5	Male	53	26.1719	head	medium-high differentiation	Negative	Positive	Positive	Negative	Negative	Positive	≥IIIa	Presence	44.6	2	384.06	3.32	14	1	11	1
112	0	1.5	Male	45	22.6757	body and tail	poorly	Positive	Negative	Positive	Negative	Positive	Negative	＜IIIa	Absence	41.3	3	394.1	2.32	39	1	32	1
113	2	3.5	Female	71	22.7583	head	medium-high differentiation	Positive	Positive	Negative	Positive	Positive	Positive	＜IIIa	Absence	44.1	3	394.8	3.47	15	0	15	0
114	3	1.3	Male	66	21.5451	head	medium-high differentiation	Positive	Positive	Positive	Negative	Negative	Positive	＜IIIa	Absence	39.3	2	140.7	1.42	15	0	15	0
115	4	1.5	Female	63	27.5312	head	medium-high differentiation	Positive	Positive	Positive	Positive	Positive	Positive	≥IIIa	Absence	40.5	3	56.83	2.32	15	0	11	1
116	3	1.5	Male	41	19.9594	head	poorly	Positive	Negative	Positive	Positive	Negative	Negative	＜IIIa	Absence	40.15	1	91.34	6.56	16	1	12	1
117	2	1.5	Female	75	19.3962	head	poorly	Positive	Positive	Positive	Negative	Negative	Positive	≥IIIa	Absence	34.9	2	394.8	1.04	19	1	15	1
118	2	2.5	Male	51	24.4473	head	medium-high differentiation	Positive	Negative	Negative	Negative	Negative	Positive	＜IIIa	Absence	52	1	394.9	1.76	38	0	38	0
119	3	3.5	Female	59	23.1247	head	medium-high differentiation	Positive	Positive	Positive	Negative	Negative	Positive	＜IIIa	Absence	32.8	2	6.59	1.5	23	0	21	1
120	2	2.5	Male	53	21.6311	body and tail	medium-high differentiation	Negative	Negative	Positive	Negative	Negative	Negative	＜IIIa	Presence	52.35	1	292.7	3.46	25	0	25	0
121	1	1.4	Male	50	16.845	head	poorly	Positive	Positive	Positive	Negative	Negative	Negative	＜IIIa	Absence	41.8	2	30.79	5.71	27	0	27	0
122	2	1.5	Male	48	27.0552	head	medium-high differentiation	Positive	Negative	Positive	Negative	Negative	Negative	＜IIIa	Presence	45.75	1	145.93	1.32	37	1	35	1
123	6	2.5	Male	63	21.9899	body and tail	poorly	Positive	Negative	Negative	Positive	Negative	Positive	＜IIIa	Absence	34.05	1	12.4	5.23	28	0	28	0
124	1	2.5	Female	52	19.313	head	poorly	Positive	Negative	Positive	Negative	Negative	Positive	＜IIIa	Absence	47.95	1	87.16	2.32	20	0	20	0
125	3	1.5	Male	55	23.597	head	medium-high differentiation	Positive	Positive	Negative	Negative	Negative	Positive	＜IIIa	Absence	39.7	2	5.93	3.1	28	1	22	1
126	0	3.5	Male	52	21.5045	head	poorly	Positive	Positive	Negative	Negative	Negative	Negative	≥IIIa	Absence	33.45	2	66.41	2.75	30	0	30	0
127	2	1.5	Male	65	20.8325	head	poorly	Positive	Negative	Positive	Negative	Negative	Negative	＜IIIa	Absence	35.15	1	9.73	3.93	31	0	31	0
128	4	2.5	Female	66	19.9792	head	medium-high differentiation	Positive	Negative	Positive	Negative	Negative	Negative	＜IIIa	Absence	35.4	1	7.26	1.53	34	1	31	1
129	2	1.5	Male	48	18.1449	head	medium-high differentiation	Negative	Negative	Negative	Positive	Negative	Positive	＜IIIa	Presence	46.2	1	9.7	1.65	36	0	36	0
130	0	1.1	Female	59	20.9321	head	poorly	Positive	Positive	Positive	Negative	Negative	Positive	＜IIIa	Absence	45.55	2	152.97	7.57	39	1	33	1
131	3	2.5	Female	61	17.8565	head	medium-high differentiation	Positive	Negative	Positive	Negative	Negative	Positive	＜IIIa	Absence	43.55	1	4.76	1.71	40	0	36	1
132	2	3.5	Male	58	21.6041	dispersed	medium-high differentiation	Positive	Positive	Positive	Negative	Positive	Negative	≥IIIa	Absence	34.75	3	22.5	1.65	40	0	40	0
133	2	3.5	Female	65	24.6711	body and tail	medium-high differentiation	Positive	Negative	Positive	Negative	Negative	Negative	＜IIIa	Absence	34.15	1	42.67	5.68	42	1	39	1
134	3	1.5	Male	66	18.6453	head	poorly	Positive	Negative	Positive	Negative	Positive	Negative	＜IIIa	Absence	31.55	3	374.1	9.1	43	1	43	0
135	3	3.5	Female	45	20.8325	head	medium-high differentiation	Positive	Negative	Positive	Negative	Negative	Positive	＜IIIa	Absence	46.7	1	24.89	2.3	44	0	44	0
136	2	2	Male	69	20.8325	head	medium-high differentiation	Positive	Negative	Positive	Negative	Negative	Negative	＜IIIa	Absence	39.55	1	4.26	2.4	45	1	41	1
137	2	2.5	Female	67	18.4911	head	poorly	Positive	Negative	Negative	Negative	Negative	Negative	≥IIIa	Presence	34.95	1	300.7	3.53	41	0	36	1
138	3	3.5	Male	62	25.9645	dispersed	medium-high differentiation	Positive	Negative	Positive	Positive	Negative	Positive	＜IIIa	Absence	46.45	1	62.09	4.06	54	0	54	0
139	2	5.5	Female	52	22.5466	body and tail	medium-high differentiation	Negative	Negative	Positive	Negative	Negative	Negative	＜IIIa	Absence	46	2	8.5	2.32	60	1	52	1
140	3	2.5	Female	47	19.3821	head	medium-high differentiation	Negative	Negative	Positive	Negative	Negative	Negative	＜IIIa	Absence	41.4	1	12.7	3.22	62	1	56	1
141	3	3.2	Male	52	20.6	head	medium-high differentiation	Negative	Negative	Positive	Negative	Negative	Negative	＜IIIa	Absence	44.7	1	4.76	3.11	38	0	33	1
142	6	3	Female	57	17	body and tail	poorly	Positive	Negative	Positive	Negative	Negative	Positive	＜IIIa	Presence	32.35	3	12.4	17	26	0	26	0
143	2	7.5	Male	58	25.6	head	medium-high differentiation	Negative	Negative	Positive	Negative	Negative	Negative	＜IIIa	Absence	41.1	2	4.26	6.39	43	1	39	1
144	3	2	Male	61	20.9	body and tail	poorly	Positive	Positive	Positive	Positive	Positive	Positive	＜IIIa	Absence	48.25	3	694.4	3.07	6	1	5	1
145	4	4.5	Male	64	19.3	head	poorly	Positive	Positive	Negative	Positive	Negative	Positive	＜IIIa	Absence	38.5	3	494.7	13.2	5	1	3	1
146	2	1.8	Female	35	18	head	poorly	Positive	Negative	Positive	Negative	Negative	Positive	＜IIIa	Absence	43.55	1	9.73	4.47	29	0	29	0
147	4	3	Male	43	18.5	body and tail	medium-high differentiation	Negative	Negative	Negative	Negative	Negative	Negative	＜IIIa	Absence	44.6	1	7.26	1.61	32	1	32	1
148	6	2	Male	53	23.3	head	poorly	Positive	Positive	Positive	Positive	Positive	Positive	≥IIIa	Absence	33.05	3	594.7	6.96	4	0	4	0
149	2	3	Female	66	18.6	head	medium-high differentiation	Positive	Positive	Positive	Negative	Negative	Positive	＜IIIa	Absence	46.25	2	174.92	3.05	7	1	4	1
150	1	2	Male	72	16.9	head	poorly	Positive	Positive	Positive	Positive	Negative	Positive	＜IIIa	Absence	50.85	2	384.4	1.08	8	1	8	0
151	2	4	Female	43	17	head	medium-high differentiation	Negative	Negative	Negative	Negative	Negative	Negative	＜IIIa	Absence	58.35	1	42.67	9.07	40	0	36	1
152	2	1.3	Female	64	18.6	head	medium-high differentiation	Positive	Positive	Positive	Negative	Negative	Positive	＜IIIa	Presence	39.95	2	367.3	38.35	13	0	13	0
153	2	5	Male	54	19.9	head	poorly	Positive	Positive	Positive	Negative	Negative	Positive	＜IIIa	Absence	47.75	2	313.5	4.14	11	1	9	1
154	2	2	Female	47	23	head	poorly	Positive	Positive	Positive	Negative	Positive	Positive	＜IIIa	Absence	53.45	3	198.05	2.4	12	0	12	0
155	3	2	Female	32	20.5	dispersed	medium-high differentiation	Positive	Negative	Positive	Negative	Negative	Positive	＜IIIa	Absence	54.6	1	6.59	6.05	21	0	21	0
156	3	1.6	Male	65	20.2	head	medium-high differentiation	Positive	Positive	Negative	Positive	Negative	Negative	＜IIIa	Absence	35.1	2	327.8	2.23	5	1	4	1
157	2	2	Female	43	19.7	body and tail	poorly	Positive	Positive	Positive	Positive	Negative	Positive	＜IIIa	Absence	48.8	2	20.3	3.35	4	0	3	1
158	5	4	Male	59	25.7	head	poorly	Positive	Positive	Negative	Positive	Positive	Positive	≥IIIa	Presence	37.9	3	6.59	3.41	3	1	3	1
159	3	11	Male	39	21.5	head	poorly	Positive	Negative	Positive	Positive	Positive	Positive	≥IIIa	Absence	40.1	3	61.03	26.34	7	0	7	0
160	4	1.9	Male	36	22	head	medium-high differentiation	Positive	Positive	Negative	Negative	Negative	Positive	＜IIIa	Presence	40.85	2	71.69	2.18	6	1	5	1
161	0	4.6	Male	58	25.7	head	poorly	Positive	Positive	Positive	Positive	Negative	Negative	＜IIIa	Absence	48.1	3	366.3	37	8	1	5	1
162	1	3	Female	48	22.2	body and tail	medium-high differentiation	Negative	Negative	Positive	Negative	Positive	Positive	＜IIIa	Absence	47.65	3	30.79	2.15	25	0	25	0
163	3	5	Female	41	18.8	head	poorly	Positive	Positive	Positive	Negative	Positive	Negative	＜IIIa	Absence	48.7	3	378.8	2.41	9	0	9	0
164	4	7	Male	69	19.8	body and tail	poorly	Positive	Positive	Positive	Negative	Positive	Positive	＜IIIa	Absence	47.65	3	11.02	2.26	8	1	6	1
165	2	3	Male	44	22.3	head	medium-high differentiation	Negative	Negative	Positive	Negative	Negative	Negative	＜IIIa	Presence	49.1	1	22.5	6.18	38	0	38	0
166	6	1.4	Male	42	24.6	head	poorly	Positive	Positive	Negative	Positive	Negative	Positive	≥IIIa	Absence	32.6	2	142.35	2.07	2.5	0	2.5	0
167	5	3	Female	71	17.9	body and tail	medium-high differentiation	Negative	Positive	Positive	Negative	Positive	Positive	≥IIIa	Absence	31.45	3	127.16	1.31	2	1	2	1
168	6	8.5	Female	61	17.8	head	medium-high differentiation	Positive	Negative	Positive	Negative	Positive	Negative	≥IIIa	Absence	32.5	3	369.84	6.18	6	1	5	1
169	3	4.2	Female	74	15	head	poorly	Positive	Positive	Negative	Negative	Negative	Positive	＜IIIa	Presence	34.55	3	333.5	3.21	1.5	0	1	1
170	7	4	Male	51	14.9	head	medium-high differentiation	Positive	Positive	Positive	Negative	Positive	Positive	＜IIIa	Absence	28.8	3	106.1	3.32	3	1	3	1
171	4	2.5	Female	60	19.3	dispersed	medium-high differentiation	Positive	Positive	Positive	Positive	Negative	Positive	≥IIIa	Absence	33.75	2	262.14	4.45	6	1	4	1
172	3	3	Female	66	20.9	head	poorly	Positive	Negative	Positive	Positive	Positive	Positive	＜IIIa	Absence	44.75	3	65.13	10.34	9	0	7	0
173	2	2.2	Male	39	19	body and tail	medium-high differentiation	Positive	Negative	Negative	Negative	Negative	Negative	＜IIIa	Absence	41.9	1	352.6	3.4	23	0	23	0
174	4	2	Male	61	23.6	head	poorly	Positive	Positive	Positive	Positive	Positive	Positive	＜IIIa	Absence	36.95	3	208.82	2.4	6	1	6	1
175	5	1.5	Male	67	20	head	poorly	Positive	Positive	Positive	Positive	Positive	Negative	＜IIIa	Presence	40.35	3	394.8	3.55	5	1	3	1
176	2	1.1	Male	39	19.8	head	poorly	Positive	Negative	Positive	Negative	Negative	Positive	＜IIIa	Absence	36.3	2	394.1	1.5	12	1	11	1
177	0	4	Female	52	21.5	head	medium-high differentiation	Positive	Negative	Negative	Negative	Negative	Negative	＜IIIa	Absence	44.65	1	152.97	2.4	37	0	37	0
178	2	2.6	Female	51	21.2	head	medium-high differentiation	Negative	Negative	Positive	Negative	Negative	Negative	＜IIIa	Absence	43.8	1	62.09	6.64	45	0	45	0
179	7	3.3	Female	43	13.4	body and tail	medium-high differentiation	Positive	Positive	Positive	Positive	Positive	Positive	≥IIIa	Presence	26.6	3	179.12	1.12	7	1	5	1
180	2	5	Male	63	23.5	head	medium-high differentiation	Negative	Negative	Positive	Negative	Negative	Negative	＜IIIa	Absence	43.8	1	4.3	1.84	51	1	45	1
181	4	1.5	Male	49	25.9	head	medium-high differentiation	Negative	Negative	Positive	Negative	Negative	Negative	≥IIIa	Presence	46.25	1	6.3	1.58	64	0	64	0
182	5	2	Male	41	22.3	body and tail	poorly	Positive	Positive	Positive	Negative	Positive	Positive	＜IIIa	Absence	42.95	3	142.96	3.54	4	0	4	0
183	1	1.9	Female	67	22.4	head	medium-high differentiation	Positive	Negative	Positive	Positive	Negative	Positive	＜IIIa	Absence	45.75	1	87.17	5.79	26	0	26	0
184	2	3	Male	62	21.1	head	medium-high differentiation	Positive	Negative	Negative	Negative	Negative	Negative	＜IIIa	Absence	40.95	1	9.7	1.4	34	0	34	0
185	3	2	Female	59	27.3	head	medium-high differentiation	Positive	Positive	Positive	Positive	Positive	Positive	≥IIIa	Absence	42.15	3	221.29	5.31	6	1	5	1
186	3	2.3	Male	37	19.6	head	poorly	Positive	Positive	Negative	Positive	Positive	Positive	＜IIIa	Absence	41.8	3	237.2	2.4	7	0	7	0
187	6	2.1	Female	71	19.1	head	poorly	Positive	Positive	Positive	Negative	Negative	Positive	≥IIIa	Absence	36.55	2	151.33	3.18	5	1	3	1
188	0	1.9	Male	47	24.1	head	medium-high differentiation	Positive	Negative	Positive	Negative	Positive	Positive	＜IIIa	Absence	53.65	3	359.05	2.83	12	0	12	0
189	4	5	Female	55	22.8	head	medium-high differentiation	Positive	Negative	Positive	Negative	Positive	Negative	＜IIIa	Absence	34.45	3	379.7	4.01	8	1	6	1
190	0	3	Male	49	21.3	body and tail	medium-high differentiation	Negative	Negative	Positive	Negative	Negative	Positive	＜IIIa	Presence	54	1	66.41	1.61	28	0	28	0
191	3	2	Male	46	16.4	head	poorly	Positive	Positive	Positive	Negative	Positive	Positive	＜IIIa	Absence	43.45	3	3.92	1.73	9	0	9	0
192	2	0.9	Male	44	26.8	head	medium-high differentiation	Positive	Negative	Positive	Negative	Negative	Negative	＜IIIa	Presence	47.4	1	145.93	7.65	25	1	21	1
193	5	1.1	Male	59	21.7	body and tail	poorly	Positive	Positive	Positive	Positive	Positive	Positive	＜IIIa	Absence	35.7	3	62.84	1.79	8	1	8	0
194	3	2	Female	48	19	head	poorly	Positive	Negative	Negative	Negative	Negative	Negative	＜IIIa	Absence	49.6	1	140.7	1.73	13	0	13	0
195	3	2	Male	51	23.2	head	medium-high differentiation	Positive	Positive	Positive	Negative	Negative	Positive	＜IIIa	Absence	41.35	2	224.1	5.76	5	1	3	1
196	6	1.4	Male	48	21.2	head	poorly	Positive	Positive	Negative	Negative	Positive	Negative	≥IIIa	Absence	35.1	3	285.98	9.18	4	1	2	1
197	3	3	Male	61	20.5	head	poorly	Positive	Negative	Positive	Negative	Negative	Positive	＜IIIa	Absence	36.8	1	91.34	2.38	14	0	11	0
198	3	1.9	Female	62	19.7	head	medium-high differentiation	Positive	Negative	Positive	Negative	Negative	Negative	＜IIIa	Absence	37.05	1	5.93	2.48	26	0	26	0
199	3	2	Male	44	17.7	head	medium-high differentiation	Negative	Negative	Negative	Positive	Negative	Negative	＜IIIa	Presence	47.85	1	24.89	3.61	42	1	41	0
200	2	2.1	Female	55	20.6	head	poorly	Positive	Negative	Positive	Negative	Negative	Positive	＜IIIa	Absence	47.2	2	385.5	4.14	17	1	15	1
201	4	2.6	Female	57	17.4	head	medium-high differentiation	Positive	Negative	Positive	Negative	Negative	Positive	＜IIIa	Absence	45.2	3	56.83	2.4	13	1	9	1
202	6	2	Male	54	21.3	dispersed	medium-high differentiation	Positive	Negative	Negative	Negative	Negative	Positive	≥IIIa	Absence	36.4	1	3.29	3.3	12	0	12	0
203	2	3	Female	61	24.4	body and tail	medium-high differentiation	Positive	Negative	Positive	Negative	Negative	Positive	＜IIIa	Absence	35.8	1	397.7	5.45	17	1	14	1
204	6	4.3	Male	62	18.2	head	poorly	Positive	Positive	Negative	Negative	Negative	Positive	＜IIIa	Absence	33.2	3	345.4	4.63	6	1	6	1
205	1	1.7	Female	41	20.5	head	medium-high differentiation	Positive	Negative	Positive	Negative	Positive	Positive	＜IIIa	Absence	48.35	3	384.06	1.08	12	0	12	0
206	3	5.3	Male	65	20.5	head	medium-high differentiation	Positive	Positive	Negative	Negative	Negative	Positive	＜IIIa	Absence	41.2	3	267.4	1.62	5	0	5	0
207	4	2.5	Female	63	18.1	head	poorly	Positive	Positive	Positive	Negative	Positive	Positive	≥IIIa	Presence	36.6	3	360.3	3.62	3	1	2	1
208	0	2	Male	58	25.7	dispersed	medium-high differentiation	Positive	Negative	Positive	Positive	Positive	Negative	＜IIIa	Absence	48.1	3	324.7	2.33	12	1	9	1
209	2	3	Female	48	22.2	body and tail	medium-high differentiation	Negative	Negative	Positive	Negative	Negative	Negative	＜IIIa	Absence	47.65	1	30.7	1.53	44	0	44	0
210	2	2.5	Female	43	19	head	medium-high differentiation	Negative	Negative	Negative	Negative	Negative	Positive	＜IIIa	Absence	43.05	1	338.4	1.31	41	0	41	0
211	6	2	Male	54	20	head	medium-high differentiation	Negative	Positive	Positive	Negative	Negative	Negative	＜IIIa	Absence	39.95	1	373.04	2.88	4	1	3	1
212	6	2.5	Female	39	16.4	body and tail	poorly	Positive	Negative	Negative	Negative	Positive	Positive	＜IIIa	Presence	27.6	3	154.53	16.77	2	0	2	1
213	6	7.6	Male	60	24.9	head	medium-high differentiation	Negative	Negative	Positive	Negative	Positive	Positive	＜IIIa	Absence	36.35	3	145.55	6.16	3	0	3	1
214	3	1.5	Male	63	20.2	body and tail	poorly	Positive	Positive	Positive	Positive	Negative	Positive	＜IIIa	Absence	43.5	2	313.2	2.84	1.5	1	1.5	1
215	5	5.5	Male	76	18.6	head	poorly	Positive	Positive	Positive	Positive	Positive	Positive	＜IIIa	Absence	33.75	3	130.36	12.97	1	1	1	1
216	5	1.5	Female	37	17.5	head	poorly	Positive	Positive	Negative	Negative	Positive	Negative	＜IIIa	Absence	38.8	3	9.79	4.24	3	0	3	0
217	7	2.5	Male	45	17.9	body and tail	medium-high differentiation	Negative	Negative	Positive	Negative	Negative	Positive	＜IIIa	Absence	39.85	1	109.9	1.38	2	1	2	1
218	4	1.5	Male	55	22.7	head	poorly	Positive	Positive	Positive	Positive	Positive	Negative	≥IIIa	Absence	28.3	3	363.9	6.73	3	0	3	1
219	6	2.5	Female	68	17.9	head	medium-high differentiation	Positive	Positive	Positive	Negative	Negative	Negative	＜IIIa	Absence	41.5	2	597.9	2.82	4	1	4	1
220	2	1.5	Male	74	16.4	head	poorly	Positive	Positive	Negative	Positive	Positive	Positive	＜IIIa	Absence	46.1	3	23.5	0.85	6	0	5	1
221	5	4.5	Female	45	16.4	head	medium-high differentiation	Negative	Negative	Positive	Negative	Negative	Positive	＜IIIa	Absence	53.6	3	146.16	8.84	4	1	4	1
222	6	1.5	Female	66	17.9	head	medium-high differentiation	Positive	Positive	Negative	Negative	Negative	Negative	＜IIIa	Presence	35.2	2	289.18	38.12	4	0	4	0
223	4	4.5	Male	56	19.3	head	poorly	Positive	Negative	Positive	Negative	Positive	Positive	＜IIIa	Absence	43	3	497.9	3.91	5	1	4	1
224	3	1.5	Female	29	22.2	head	poorly	Positive	Positive	Negative	Negative	Positive	Positive	＜IIIa	Absence	48.7	3	400	2.17	3	0	3	0
225	5	1.5	Female	34	19.8	dispersed	medium-high differentiation	Positive	Negative	Positive	Negative	Negative	Negative	＜IIIa	Absence	49.85	1	400	5.82	5	1	5	1
226	3	2	Male	67	19.5	head	medium-high differentiation	Positive	Positive	Positive	Positive	Positive	Positive	＜IIIa	Absence	30.35	3	227.3	2	5	1	3	1
227	3	1.5	Female	45	19	body and tail	poorly	Positive	Positive	Positive	Positive	Negative	Positive	＜IIIa	Absence	44.05	2	270.6	3.12	5	0	5	0
228	3	3.5	Male	61	25.1	head	poorly	Positive	Negative	Negative	Positive	Positive	Positive	≥IIIa	Presence	33.15	3	697.9	3.18	6	1	4	1
229	4	5.5	Male	41	20.8	head	poorly	Positive	Negative	Positive	Positive	Negative	Negative	≥IIIa	Absence	35.35	3	74.89	26.11	6	0	6	0
230	4	2	Male	38	21.4	head	medium-high differentiation	Positive	Positive	Negative	Negative	Positive	Positive	＜IIIa	Presence	36.1	2	265.34	1.95	3	1	2	1
231	3	4.5	Male	60	25	head	poorly	Positive	Positive	Positive	Positive	Negative	Negative	＜IIIa	Absence	43.35	3	212.02	36.77	6	0	6	0
232	3	2.5	Female	50	21.5	body and tail	medium-high differentiation	Negative	Negative	Positive	Negative	Positive	Positive	＜IIIa	Absence	42.9	3	224.49	1.92	6	1	5	1
233	6	4.5	Female	43	18.2	head	poorly	Positive	Positive	Positive	Negative	Negative	Positive	＜IIIa	Absence	43.95	2	400	2.18	6	0	6	1
234	2	6.5	Male	71	19.2	body and tail	poorly	Positive	Positive	Negative	Negative	Positive	Positive	＜IIIa	Absence	42.9	3	178.12	2.03	7	1	5	1
235	3	2.5	Male	46	21.7	head	medium-high differentiation	Negative	Positive	Positive	Negative	Negative	Positive	＜IIIa	Presence	44.35	2	64.23	5.95	6	0	4	0
236	7	2	Male	44	24	head	poorly	Positive	Positive	Positive	Positive	Positive	Negative	≥IIIa	Absence	27.85	3	182.32	1.84	7	1	3	1
237	3	2.5	Female	73	17.3	body and tail	medium-high differentiation	Positive	Negative	Positive	Negative	Negative	Positive	≥IIIa	Absence	26.7	1	240.4	1.08	16	0	16	0
238	1	8	Female	63	17.1	head	medium-high differentiation	Positive	Positive	Positive	Negative	Positive	Positive	≥IIIa	Absence	27.75	3	400	5.95	8	0	8	0
239	0	1.5	Female	76	14.4	head	poorly	Positive	Positive	Negative	Negative	Negative	Negative	＜IIIa	Presence	29.8	2	400	2.98	8	1	6	1
240	4	3.5	Male	53	14.4	head	medium-high differentiation	Positive	Positive	Positive	Negative	Negative	Positive	＜IIIa	Absence	24.05	3	14.22	3.09	9	1	7	1
241	4	1	Female	62	18.7	dispersed	medium-high differentiation	Positive	Positive	Positive	Positive	Positive	Positive	≥IIIa	Absence	29	3	400	4.22	8	1	8	1
242	5	2.5	Female	68	20.2	head	poorly	Positive	Negative	Positive	Positive	Negative	Positive	＜IIIa	Absence	40	2	66.04	10.11	10	1	10	1
243	3	0.7	Male	41	18.5	body and tail	medium-high differentiation	Positive	Positive	Positive	Negative	Negative	Positive	＜IIIa	Absence	37.15	2	400	3.17	9	0	9	0
244	3	1.5	Male	63	22.9	head	poorly	Positive	Positive	Positive	Positive	Positive	Negative	＜IIIa	Absence	32.2	3	68.33	2.17	10	1	5	0
245	3	1.5	Male	69	19.3	head	poorly	Positive	Positive	Negative	Positive	Negative	Negative	＜IIIa	Presence	35.6	2	7.12	3.32	9	0	9	0
246	2	1.5	Male	41	19.2	head	poorly	Positive	Negative	Positive	Negative	Positive	Positive	＜IIIa	Absence	31.55	3	400	1.27	11	1	6	1
247	2	3.5	Female	54	20.9	head	medium-high differentiation	Positive	Positive	Negative	Negative	Negative	Positive	＜IIIa	Absence	39.9	2	201.25	2.17	12	0	12	0
248	3	2.1	Female	53	20.6	head	medium-high differentiation	Negative	Negative	Positive	Negative	Positive	Positive	＜IIIa	Absence	39.05	3	400	6.41	15	1	10	1
249	0	2.8	Female	45	12.8	body and tail	medium-high differentiation	Negative	Positive	Negative	Positive	Negative	Positive	≥IIIa	Presence	21.85	2	362.25	0.89	12	0	12	0
250	6	2.5	Male	65	22.7	head	medium-high differentiation	Negative	Negative	Positive	Negative	Negative	Positive	＜IIIa	Absence	39.05	1	6.49	1.61	14	0	14	0
251	1	3.5	Male	51	25.2	head	medium-high differentiation	Negative	Positive	Positive	Negative	Positive	Positive	≥IIIa	Presence	41.5	3	387.26	1.35	12	1	11	1
252	0	1.5	Male	43	21.7	body and tail	poorly	Positive	Positive	Negative	Negative	Negative	Negative	＜IIIa	Absence	38.2	2	400	3.31	37	1	30	1
253	2	2.5	Female	69	21.8	head	medium-high differentiation	Positive	Positive	Positive	Positive	Positive	Positive	＜IIIa	Absence	41	3	400	5.56	13	0	13	0
254	3	2.5	Male	64	20.5	head	medium-high differentiation	Positive	Negative	Positive	Negative	Negative	Positive	＜IIIa	Absence	36.2	2	143.9	1.17	13	0	13	0
255	4	0.3	Female	61	26.5	head	medium-high differentiation	Positive	Negative	Negative	Positive	Negative	Positive	≥IIIa	Absence	37.4	3	60.03	5.08	13	1	8	1
256	3	1.5	Male	39	19	head	poorly	Positive	Negative	Positive	Positive	Negative	Negative	＜IIIa	Absence	37.05	2	94.54	2.17	14	0	11	0
257	2	1.5	Female	73	18.4	head	poorly	Positive	Positive	Positive	Negative	Negative	Positive	≥IIIa	Absence	31.8	2	400	2.95	17	1	13	1
258	2	1.6	Male	49	23.4	head	medium-high differentiation	Positive	Negative	Positive	Negative	Positive	Positive	＜IIIa	Absence	48.9	3	400	2.6	36	0	36	0
259	3	4.5	Female	57	22.1	head	medium-high differentiation	Positive	Positive	Negative	Negative	Positive	Positive	＜IIIa	Absence	29.7	3	9.79	3.78	21	0	21	0
260	2	2.5	Male	51	20.6	body and tail	medium-high differentiation	Negative	Negative	Positive	Negative	Negative	Negative	＜IIIa	Presence	49.25	1	400	1.38	23	1	21	1
261	1	1.5	Male	48	15.8	head	poorly	Positive	Positive	Positive	Negative	Negative	Negative	＜IIIa	Absence	38.7	2	33.99	1.5	25	0	25	0
262	2	2.4	Male	46	26.1	head	medium-high differentiation	Positive	Negative	Negative	Negative	Positive	Negative	＜IIIa	Presence	42.65	3	149.13	7.42	35	1	28	1
263	6	1.5	Male	61	21	body and tail	poorly	Positive	Negative	Positive	Positive	Negative	Positive	＜IIIa	Absence	30.95	1	15.6	1.56	26	0	26	0
264	1	1.5	Female	50	18.3	head	poorly	Positive	Positive	Positive	Negative	Positive	Positive	＜IIIa	Absence	44.85	3	90.37	1.5	18	0	15	0
265	3	1.5	Male	53	22.6	head	medium-high differentiation	Positive	Negative	Negative	Negative	Negative	Positive	＜IIIa	Absence	36.6	2	9.13	5.53	26	0	26	0
266	0	2.1	Male	50	20.5	head	poorly	Positive	Negative	Positive	Negative	Positive	Negative	≥IIIa	Absence	30.35	3	69.61	8.95	28	1	20	1
267	2	2.5	Male	63	19.8	head	poorly	Positive	Negative	Positive	Negative	Negative	Negative	＜IIIa	Absence	32.05	1	12.93	2.15	29	0	29	0
268	4	0.5	Female	64	19	head	medium-high differentiation	Positive	Negative	Negative	Negative	Negative	Negative	＜IIIa	Absence	32.3	1	10.46	2.25	32	1	26	1
269	2	1.5	Male	46	17.1	head	medium-high differentiation	Negative	Negative	Positive	Positive	Negative	Positive	＜IIIa	Presence	43.1	1	12.9	3.38	34	1	30	1
270	0	0.5	Female	57	19.9	head	poorly	Positive	Negative	Negative	Negative	Negative	Positive	＜IIIa	Absence	42.45	1	156.17	3.91	37	0	37	0
271	3	0.1	Female	59	16.9	head	medium-high differentiation	Positive	Negative	Positive	Negative	Negative	Positive	＜IIIa	Absence	40.45	1	7.96	2.17	38	0	33	1
272	2	1.5	Male	56	20.6	dispersed	medium-high differentiation	Positive	Negative	Positive	Negative	Negative	Negative	≥IIIa	Absence	31.65	1	25.7	3.07	38	0	38	0
273	2	2.5	Female	63	23.7	body and tail	medium-high differentiation	Positive	Negative	Positive	Negative	Negative	Negative	＜IIIa	Absence	31.05	1	45.87	6.41	40	1	36	1
274	3	2.5	Male	64	17.6	head	poorly	Negative	Positive	Negative	Negative	Negative	Negative	＜IIIa	Absence	28.45	2	400	0.89	41	0	41	0
275	3	2.3	Female	43	19.8	head	medium-high differentiation	Positive	Negative	Positive	Negative	Positive	Positive	＜IIIa	Absence	43.6	3	28.09	1.61	42	1	39	1
276	2	2.5	Male	67	19.8	head	medium-high differentiation	Positive	Negative	Negative	Negative	Negative	Negative	＜IIIa	Absence	36.45	2	7.46	1.35	43	1	38	1
277	2	1	Female	65	17.5	head	poorly	Negative	Negative	Positive	Negative	Positive	Negative	≥IIIa	Presence	31.85	3	303.9	3.31	59	0	59	0
278	3	1.5	Male	60	25	dispersed	medium-high differentiation	Negative	Negative	Positive	Positive	Negative	Positive	＜IIIa	Absence	43.35	1	65.29	5.56	62	0	62	0
279	2	2.5	Female	50	21.5	body and tail	medium-high differentiation	Negative	Negative	Negative	Negative	Negative	Negative	＜IIIa	Absence	42.9	1	11.9	1.17	48	0	41	0
280	3	2.5	Female	45	18.4	head	medium-high differentiation	Negative	Negative	Positive	Negative	Negative	Negative	＜IIIa	Absence	41.3	1	15.9	5.08	50	1	42	1
281	2	1.5	Male	34	18.4	head	medium-high differentiation	Negative	Negative	Positive	Negative	Negative	Negative	＜IIIa	Absence	50	1	31.29	2.17	57	1	50	1
282	1	1.8	Female	45	17.1	body and tail	medium-high differentiation	Negative	Negative	Positive	Negative	Negative	Positive	＜IIIa	Absence	47	1	19.9	2.95	53	0	53	0
283	3	4.5	Male	47	19.2	body and tail	medium-high differentiation	Positive	Positive	Negative	Positive	Negative	Negative	≥IIIa	Absence	44	2	23.23	2.6	42	1	35	1
284	1	3.8	Male	72	16.9	body and tail	poorly	Negative	Negative	Positive	Negative	Negative	Positive	＜IIIa	Absence	39.15	1	9.69	3.78	34	0	31	1
285	3	2.1	Male	65	20.3	head	medium-high differentiation	Positive	Negative	Negative	Negative	Negative	Positive	＜IIIa	Absence	44.1	1	124.1	1.38	32	0	32	0
286	2	4.8	Female	71	23.4	head	poorly	Positive	Negative	Positive	Positive	Positive	Positive	＜IIIa	Absence	39.8	3	351.8	6.16	24	1	19	1
287	5	5.7	Male	55	17.1	body and tail	poorly	Positive	Negative	Negative	Positive	Negative	Positive	≥IIIa	Absence	35.9	3	390.46	2.84	12	1	9	1
288	6	4.8	Female	64	19.2	head	poorly	Positive	Negative	Positive	Positive	Negative	Positive	＜IIIa	Absence	32.8	3	273.8	12.97	10	0	10	0
289	4	5.2	Male	70	19.1	body and tail	poorly	Positive	Positive	Positive	Negative	Negative	Negative	≥IIIa	Absence	34.1	3	366.7	4.24	8	1	8	1
290	2	4.4	Male	43	17.4	head	medium-high differentiation	Positive	Positive	Positive	Negative	Positive	Positive	＜IIIa	Presence	33.55	3	331.1	1.38	14	1	8	1
291	5	3.8	Female	66	19.8	dispersed	medium-high differentiation	Positive	Negative	Positive	Negative	Negative	Negative	≥IIIa	Absence	43.7	1	37.1	6.73	34	1	30	1
292	2	2.1	Female	56	25.7	body and tail	poorly	Positive	Positive	Positive	Positive	Negative	Positive	＜IIIa	Presence	40.3	2	344.8	2.82	25	1	20	1
293	3	2.7	Male	57	22.8	head	poorly	Positive	Negative	Negative	Negative	Negative	Positive	＜IIIa	Absence	43.6	1	379.44	0.85	28	0	28	0
294	1	1.6	Male	44	23.6	body and tail	medium-high differentiation	Negative	Negative	Positive	Negative	Positive	Positive	≥IIIa	Absence	51.15	3	160.93	8.84	49	1	41	1
